# Supplementary material for: Blood pressure and associated factors in a North African adolescent population. a national cross-sectional study in Tunisia
Source: Springer Nature journal article supplement (doi:10.1186/1471-2458-12-98), 2012-02-03
Supplement: 12889_2011_3948_MOESM1_ESM.pdf [file 12889_2011_3948_MOESM1_ESM.pdf]

Hypertension

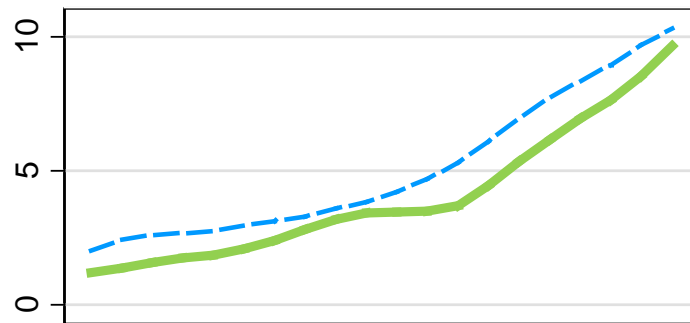

Hypertension

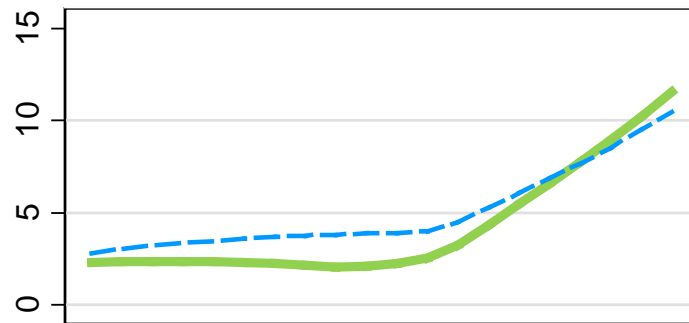

Elevated blood pressure

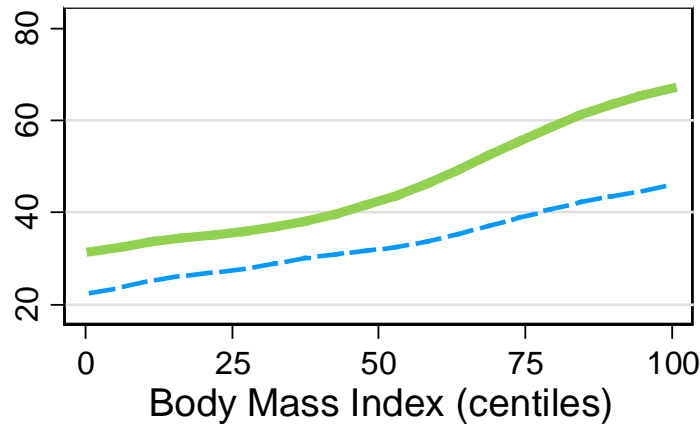

Elevated blood pressure

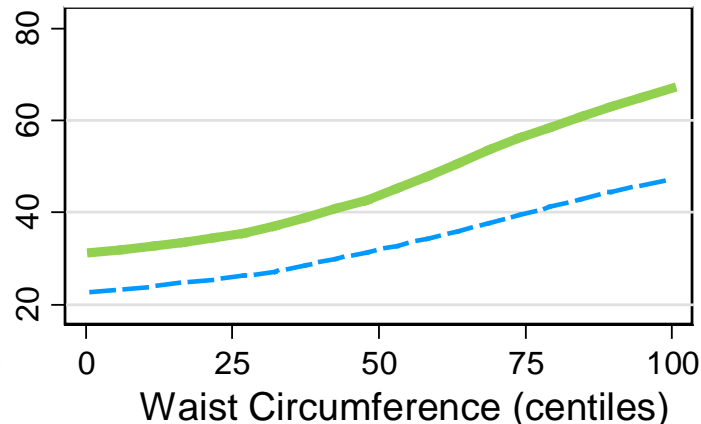

Boys (n=1294)      Girls (n=1576)  
(local polynomial smoothing)
